# Supplementary material
Source: PubMed Central journal article supplement (PMC3051257)
Supplement: supp_tpc.110.081042_SuppFiguresTables.pdf [file supp_tpc.110.081042_SuppFiguresTables.pdf]

**Supplemental Data.**  
**Hecht et al. (2011). Plant Cell 10.1105/tpc.110.081042**

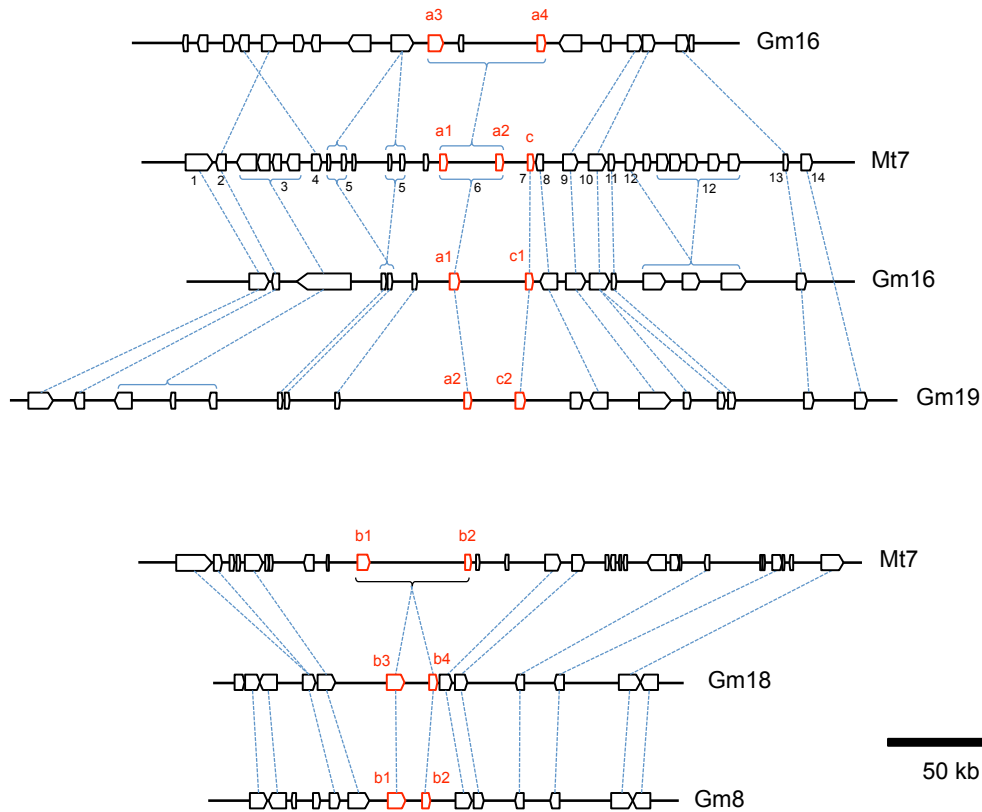

**Supplemental Figure 1: Microsynteny around *FT* genes in Medicago and soybean.**

Genes are represented as open boxes with the pointed end indicating putative direction of transcription. *FT* genes are shown in red, with letters indicating the identity of each gene. Full details are given in Supplemental Table 1. Genes with clear counterparts in more than one genomic region are connected by dashed blue lines. Numbers shown underneath genes in the region of the Mt *FTa/FTc* cluster refer to Supplemental Table 2.

## Supplemental Figure 2 : Alignment of legume PEBP amino-acid sequences.

Alignments were generated with ClustalW and manually adjusted using Genedoc (Nicholas et al., 1997). Sequence details are given in Supplemental Table 1.

Shading levels indicate degree of conservation – black = 90%, dark grey = 70%, light grey = 50%.

Red arrows indicate critical residues distinguishing FT (green) and TFL1 (blue) proteins (Ahn et al., 2006). Distinguishing residues of FTc proteins are highlighted in purple.

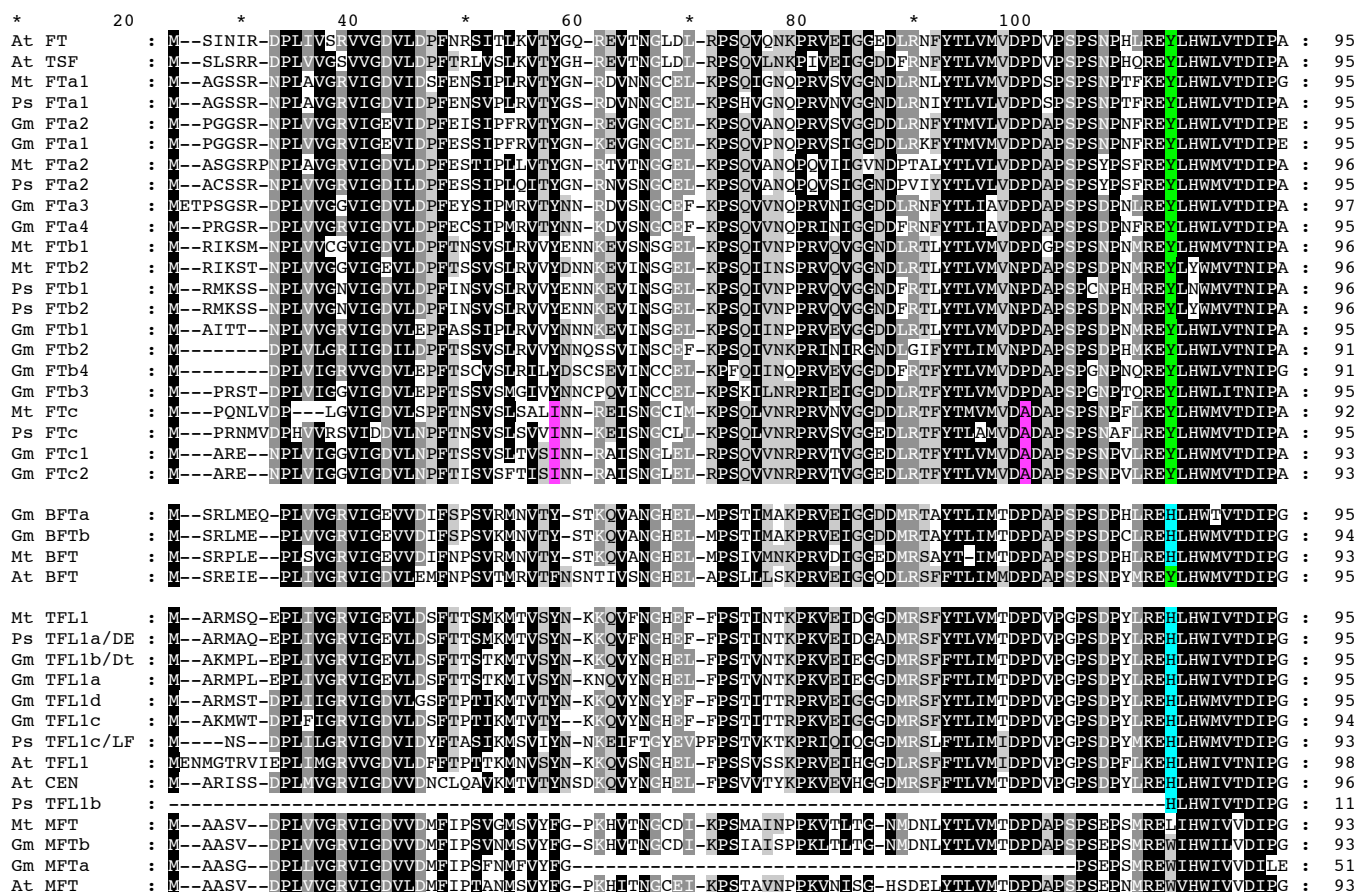

B

|              | * | 120      | *      | 140       | *       | 160     | *           | 180       | *       |         |        |        |        |          |          |          |       |
|--------------|---|----------|--------|-----------|---------|---------|-------------|-----------|---------|---------|--------|--------|--------|----------|----------|----------|-------|
| At FT        | : | TTCTTFC  | -----  | NEIVCYENP | SFTAGI  | THRIVV  | ILFROLG     | ROIVYA    | PGWRON  | FNTREF  | AEIYNL | GIPVA  | AVFYNC | QRESGCG  | --GRRL-- | : 175    |       |
| At TSF       | : | TTGNATG  | -----  | NEVVCYBSP | PRPPS   | GIHRIV  | VLFROLG     | ROIVYA    | PGWROCF | NTRREF  | AEIYNL | GIPVA  | AVFYNC | QRENGCG  | --GRRT-- | : 175    |       |
| Mt FTa1      | : | TTETVTFG | -----  | NEVVNYER  | PRPETS  | GIHREVF | VLFROQC     | RQRVYA    | PGWRONF | NTRREF  | AEIYNL | GIPVA  | AVFYNC | QRESGSG  | --GRTFR- | : 176    |       |
| Ps FTa1      | : | TTETVSFG | -----  | NEIVSYER  | PRPETS  | GIHREVF | ILFROQC     | RQRVYA    | PGWRONF | NTRREF  | AEIYNL | GIPVA  | AVFYNC | QRESGSG  | --GRTFR- | : 176    |       |
| Gm FTa2      | : | TTGNPFG  | -----  | NEVVSYS   | SPRETM  | GIHRIV  | VFLFRQOF    | RQRVYA    | PGWRONF | NTRREF  | AEIYNL | GIPVA  | AVFYNC | QRESGSG  | --GRTF-- | : 175    |       |
| Gm FTa1      | : | TTGNPFG  | -----  | NEIVSYB   | SPRETM  | GIHREVF | VFLFRQOF    | RQRVYA    | PGWRONF | NTRREF  | AEIYNL | GIPVA  | AVFYNC | QRETSGS  | --GRTF-- | : 175    |       |
| Mt FTa2      | : | TTNATSG  | -----  | NEVVSYS   | EKPRENL | GIHREVF | VLLRQOC     | RQRVYA    | PGWRONF | NTRREF  | AEIYNL | GIPVA  | AVFYNC | QRETSGS  | --GRTFR- | : 177    |       |
| Ps FTa2      | : | TTGASFG  | -----  | NEVVSYS   | EKPRENL | GIHREVF | VLLRQOC     | RQIVYA    | PGWRONF | NTRREF  | AEIYNL | GIPVA  | AVFYNC | QREAGSG  | --GRTFR- | : 176    |       |
| Gm FTa3      | : | TTGASFG  | -----  | HEVVTYB   | SPRPMG  | GIHRIV  | VFLFRQLG    | RETIVA    | PGWRONF | NTRREF  | AEIYNL | GIPVA  | AVFYNI | QRESGSG  | --GRRLY- | : 178    |       |
| Gm FTa4      | : | TTGPIFG  | -----  | HEVVTYB   | ENPRM   | GIHRIV  | VFLFRQOG    | RETIVA    | PGWRONF | NTRREF  | AEIYNL | GIPVA  | AVFYNI | QRESGCG  | --GRRLC- | : 176    |       |
| Mt FTb1      | : | TTGTTFG  | -----  | QEIVSYB   | ENPRETS | GIHRVIF | VFLFRQPC    | RHTVLA    | PGWRONF | ITRDF   | AEIYNL | GIPVA  | ALFYNC | QRENGSG  | --GRRLLI | : 178    |       |
| Mt FTb2      | : | TTGTTFG  | -----  | QEIVSYB   | SPREAS  | GIHRVIF | VFLFRQPC    | RHTVLA    | PGWRONF | ITRDF   | AEIYNL | GIPVA  | ALFYNC | QRENGSG  | --GRRMVI | : 178    |       |
| Ps FTb1      | : | TTGTTFG  | -----  | QEIVSYB   | SPRETS  | GIHRVIF | VFLFRQPC    | RHTILP    | PGWRONF | ITRDF   | AEIYNL | GIPVA  | ALFYNC | QORNGSG  | --GRRMII | : 178    |       |
| Ps FTb2      | : | TTGTAFG  | -----  | QEIVSYB   | SPREAS  | GIHRMIF | VFLFRQPC    | RHTILP    | PGWRONF | ITRDF   | AEIYNL | GIPVA  | ALFYNC | QRENGSG  | --GRRMIT | : 178    |       |
| Gm FTb1      | : | TTASAFG  | -----  | QEIVSYB   | SPRETS  | GIHRVIF | VFLFRQPR    | RMSTIPA   | PGWRONF | ITRDF   | AEIYNL | GIPVA  | AVFYNC | QORGGSG  | --GRRMLL | : 177    |       |
| Gm FTb2      | : | STGATG   | -----  | EEIVSYB   | SPRETS  | GIHRVIF | VFLFRQPF    | RQIVYA    | PGWRONF | NTRDF   | AEIYNL | GIPVA  | AVFYNC | QRENGSG  | --GRRR-- | : 171    |       |
| Gm FTb4      | : | TTGANFG  | -----  | EEVVSYS   | SPRPMG  | GIHRVIF | VFLFRQSG    | RQIIVA    | PGWRONF | NTRDF   | AEIYNL | GIPVA  | AVFYNC | QREKRNNS | SARDGRR  | : 173    |       |
| Gm FTb3      | : | TTGANFG  | -----  | EEIVSYB   | SPREIV  | GIHRVIF | VFLFRQLR    | RLTLQP    | PGWRONF | NTRDF   | AEIYNL | GIPVA  | AVFYNC | QREKRNNS | SDGRR    | : 176    |       |
| Mt FTc       | : | TTASAFG  | -----  | KEVVSYS   | SPKPSA  | GIHRVIF | VFLFRQLG    | RDIVFA    | PEWRHNF | NTRNF   | AEIYNL | GIPVA  | AVFYNC | QREKRCG  | --GRRC-- | : 171    |       |
| Ps FTc       | : | TTASAFG  | -----  | KEAVSYB   | SPKPSA  | GIHRVIF | VFLFRQLG    | RDIVFA    | PEWRHNF | NTRNF   | AEIYNL | GIPVA  | AVFYNC | QREKRCG  | --GRRC-- | : 174    |       |
| Gm FTc1      | : | TTNASFG  | -----  | REVVSYS   | SPNPSV  | GIHRVIF | VFLFRQLG    | RDIVIT    | PEWRHNF | NTRNF   | AEIYNL | GIPVA  | AVFYNC | QREKRCG  | --GRRY-- | : 172    |       |
| Gm FTc2      | : | TTNASFG  | -----  | REVVSYS   | SPNPSA  | GIHRVIF | VFLFRQLG    | RDIVIT    | PEWRHNF | NTRNF   | AEIYNL | GIPVA  | AVFYNC | QREKRCG  | --GRRY-- | : 172    |       |
|              |   |          |        |           |         |         |             |           |         |         |        |        |        |          |          |          |       |
| Gm BFTa      | : | TTDVSFG  | -----  | KEIVGYB   | SPKPV   | GIHRVIF | VFLFRQGR    | ROIVRP    | PSSRDH  | FNTTRF  | SEENGL | GIPVA  | AVFYNA | QRETAAR  | ---RR--- | : 173    |       |
| Gm BFTb      | : | TTDVSFG  | -----  | KEIVGYB   | SPKPV   | GIHRVIF | VFLFRQGR    | ROIVRP    | PSSRDH  | FNTTRF  | SEENGL | GIPVA  | AVFYNA | QRETAAR  | ---RR--- | : 172    |       |
| Mt BFT       | : | TTDVSFG  | -----  | NEIVVEY   | ENPKPV  | GIHRVIF | VFLFRQGR    | ROIVRS    | PSSRDH  | FNTTRF  | SEENGL | GIPVA  | AVFYNA | QRETAAR  | ---RR--- | : 171    |       |
| At BFT       | : | TTDASFG  | -----  | REIVRYE   | TPKEVA  | GIHRVIF | VFLFRQGR    | RQAVKAA   | PETRECF | NTRNF   | SEENGL | GIPVA  | AVFYNA | QRETAAPR | ---RRPSY | : 177    |       |
|              |   |          |        |           |         |         |             |           |         |         |        |        |        |          |          |          |       |
| Mt TFL1      | : | TTDATFG  | -----  | KEVVSYS   | EIPKPN  | GIHRVIF | VFLFRQKN    | RESVTA    | PSSRDH  | FNTTRF  | SEENGL | GIPVA  | AVFYNA | QRETAAR  | ---RR--- | : 174    |       |
| Ps TFL1a/DET | : | TTDATFG  | -----  | KEIVSYE   | IPKPN   | GIHRVIF | VFLFRQRA    | RDSVTRAT  | PSSRDH  | FNTTRF  | SEENGL | GIPVA  | AVFYNA | QRETAAR  | ---RR--- | : 174    |       |
| Gm TFL1b/Dt1 | : | TTDATFG  | -----  | KELVSYE   | VPKPN   | GIHRVIF | VFLFRQKR    | RQCVTP    | PSSRDH  | FNTTRF  | SEENGL | GIPVA  | AVFYNA | QRETAAR  | ---RR--- | : 173    |       |
| Gm TFL1a     | : | TTDATFG  | -----  | KELVSYE   | IPKPN   | GIHRVIF | VFLFRQKR    | RQCVTP    | PSSRDH  | FNTTRF  | SEENGL | GIPVA  | AVFYNA | QRETAAR  | ---RR--- | : 173    |       |
| Gm TFL1d     | : | TTNASFG  | -----  | KVLVSYE   | MPKPN   | GIHRVIF | VFLFRQKR    | RQCVTRP   | PSSRDH  | FNTTRF  | SEENGL | GIPVA  | AVFYNA | QRETAAR  | ---RR--- | : 174    |       |
| Gm TFL1c     | : | TTNASFG  | -----  | NVLVSYE   | MPKPN   | GIHRVIF | VFLFRQKR    | RQCVTRP   | PSSRDH  | FNTTRF  | SEENGL | GIPVA  | AVFYNA | QRETAAR  | ---RR--- | : 173    |       |
| Ps TFL1c/LF  | : | TTDSIFG  | -----  | KELVSYE   | PKPN    | GIHRVIF | VFLFRQKR    | GNKYSIT   | CFPSRDH | FNTTRF  | SEENGL | GIPVA  | AVFYNA | QRETAAR  | ---RR--- | : 173    |       |
| At TFL1      | : | TTDATFG  | -----  | KEVVSYS   | ELPRSI  | GIHRVIF | VFLFRQKO    | RRIIFPN   | PSSRDH  | FNTTRF  | SEENGL | GIPVA  | AVFYNA | QRETAAR  | ---RR--- | : 177    |       |
| At CEN       | : | TTDVSFG  | -----  | KEIIGYB   | MPRPN   | GIHRVIF | VFLFRQTR    | RGSVSV    | PSYRDF  | NTRREF  | AEIYNL | GIPVA  | AVFYNC | QRETAAR  | ---RR--- | : 175    |       |
| Ps TFL1b     | : | TTDATFG  | -----  | RKEVMKY   | EMPRQI  | GIHRVIF | VFLFRQKR    | ROIVM     | KIETSRD | FNTTRF  | SEENGL | GIPVA  | AVFYNA | QRETAAR  | ---RR--- | : 91     |       |
|              |   |          |        |           |         |         |             |           |         |         |        |        |        |          |          |          |       |
| Mt MFT       | : | GNPKRG   | -----  | KEILPVY   | IGPKPV  | GIHRVIF | VFLFRQKGP   | IGMVE     | QPTSRV  | SFNTRYF | SEENGL | GIPVA  | AVFYNS | QKEPAK   | ---RR--- | : 172    |       |
| Gm MFTb      | : | GNPFRG   | -----  | KEIVSYV   | GPPEPI  | GIHRVIF | VFLFRQKGPLG | LVEQPP    | TRASFN  | TRYF    | SEENGL | GIPVA  | AVFYNS | QKEPAVK  | ---RR--- | : 172    |       |
| Gm MFTa      | : | EQTHFV   | HVDVAC | MSTGGS    | RKEIVP  | YLGPRE  | PIGIHRVIF   | VFLFRQKVP | PLGLVE  | QPPTRAS | FNTRYF | SEENGL | GIPVA  | AVFYNS   | QKEPAK   | ---RR--- | : 142 |
| At MFT       | : | GNPFRG   | -----  | KEILPVY   | MEPRPV  | GIHRVIF | VFLFRQNSP   | PVGLMV    | QPPSRAN | ESTRMF  | SEENGL | GIPVA  | AVFYNS | QKEPASR  | ---RR--- | : 173    |       |

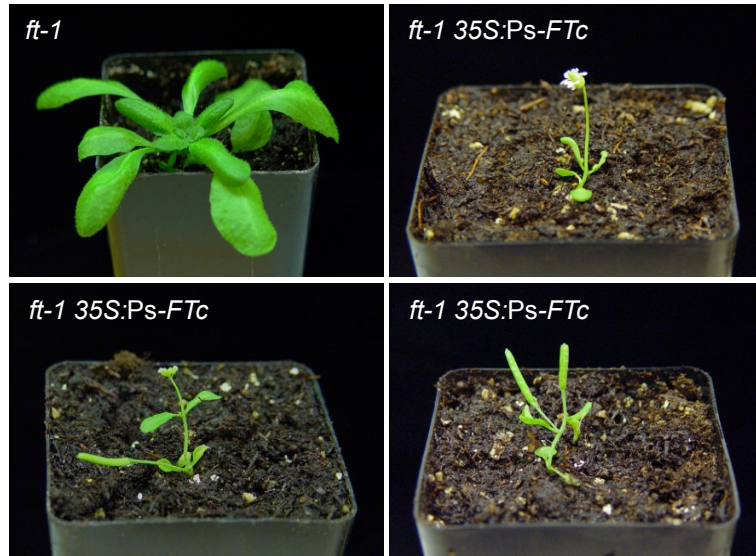

**Supplemental Figure 3:**

Overexpression of pea *FTc* in transgenic Arabidopsis results in extremely early flowering and a tendency toward production of terminal flowers. Three representative primary transformants are shown.

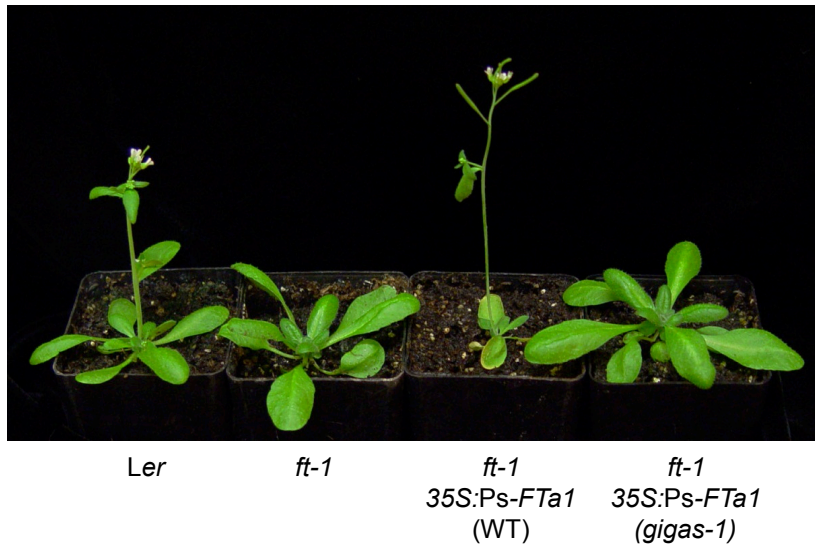

**Supplemental Figure 4:**

The *gigas-1* mutation completely impairs the activity of pea *FTa1* in transgenic Arabidopsis.

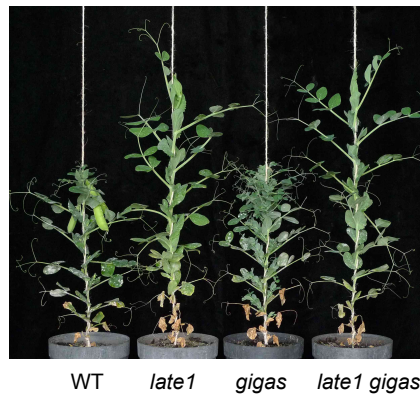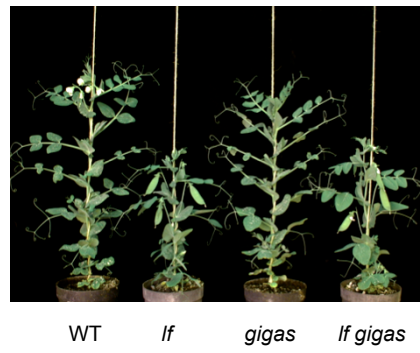

**Supplemental Figure 5:**

Photographs of representative plants of *late1-2 gigas-2* and *lf-22 gigas-2* double mutants, together with WT (NGB5839) and corresponding single mutants.

Plants were grown under LD conditions (16L/8D) in the phytotron.

## Leaf

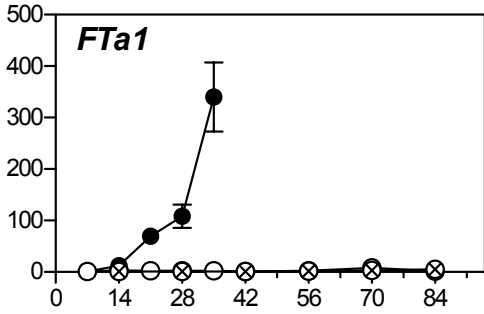

## Apex

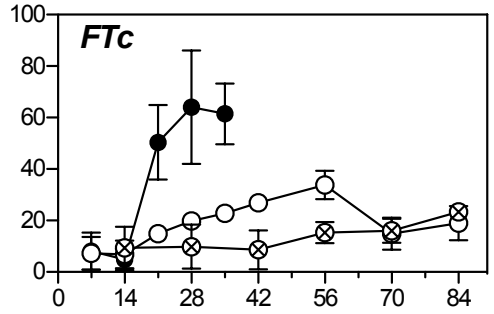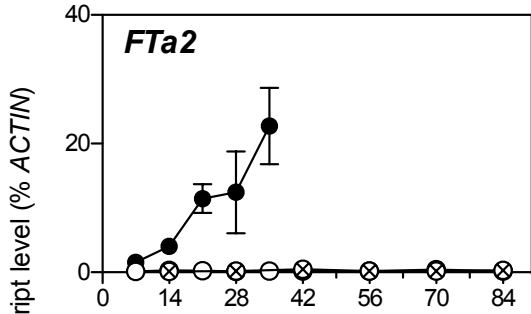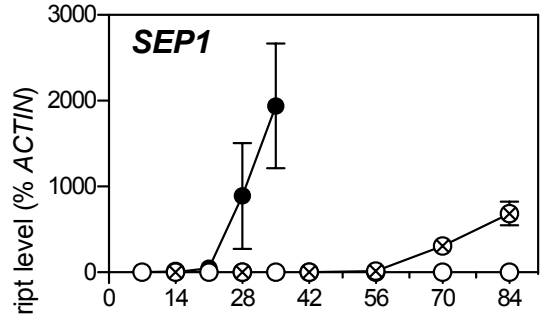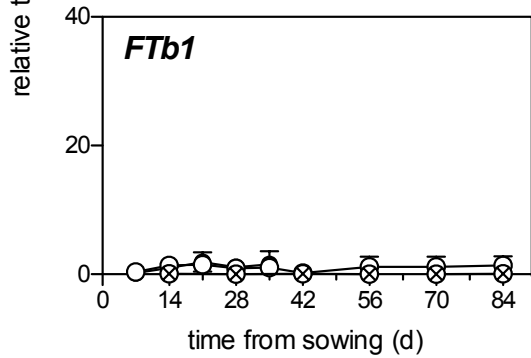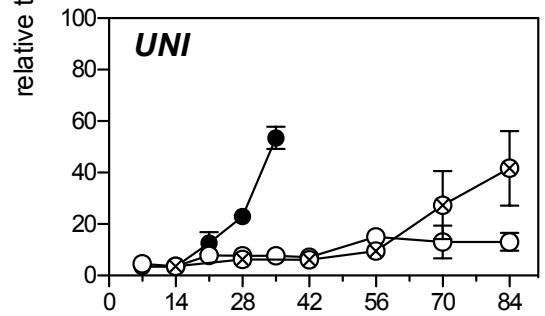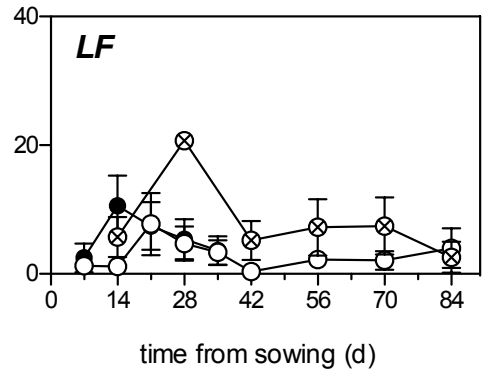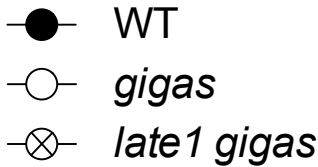

**Supplemental Figure 6:** Gene expression in NGB5839 (WT), *gigas-2*, and the *late1-2 gigas-2* double mutant during development under LD conditions (16L/8D). Relative transcript levels were determined in dissected shoot apices (Apex) or the uppermost fully-expanded leaf (Leaf). Values are normalized to the transcript level of the *ACTIN* gene, and represent mean  $\pm$  SE for n= 2-3 biological replicates, each consisting of pooled material from two plants.

**Supplemental Table 1** Details of *FT*-like sequences in pea, Medicago and soybean. Gene models were identified in BLAST searches on on Mtr 3.0 at JCVI (Medicago, <http://www.jcvi.org/cgi-bin/medicago/index.cgi>) and Glyma1.0 at Phytozome (soybean, <http://www.phytozome.net/soybean.php>). The Medicago *FTa2* and *FTb2* genes are incorrectly annotated as three (*FTa2*) or two (*FTb2*) separate gene models in Mtr3.0. Several of the listed soybean gene models are also likely incorrectly annotated and have been corrected for the phylogenetic analyses in Figure 1 and Supplemental Figure 2. Gene models for soybean genes *FTa1*, *FTa3* and *FTb4* are missing the most likely translational start site whereas *FTb3* and *MFTa* have additional exons included. Conceptual translation of the corrected *MFTa* gene model reveals a frameshift and premature truncation resulting from a substitution and single base insertion in exon 3.

| Species  | Gene name                | Gene model       | Previous name  | Accession # (cDNA / gDNA) |
|----------|--------------------------|------------------|----------------|---------------------------|
| Pea      | Ps <i>FTa1/GIGAS</i>     |                  |                | HQ538822 / HQ538830       |
|          | Ps <i>fta1 (gigas-1)</i> |                  |                | HQ538821                  |
|          | Ps <i>FTa2</i>           |                  |                | HQ538823                  |
|          | Ps <i>FTb1</i>           |                  |                | HQ538824                  |
|          | Ps <i>FTb2</i>           |                  | Ps <i>FTL</i>  | HQ538825 / HQ538831       |
|          | Ps <i>FTc</i>            |                  |                | HQ538826 / HQ538832       |
|          | Ps <i>TFL1a/DET</i>      |                  |                | AY340579                  |
|          | Ps <i>TFL1b</i>          |                  |                | AY340580                  |
|          | Ps <i>TFL1c/LF</i>       |                  |                | AY343326                  |
| Medicago | Mt <i>FTa1</i>           | Medtr7g099820    | Mt <i>FTLa</i> |                           |
|          | Mt <i>FTa2</i>           | Medtr7g099850-70 | Mt <i>FTLb</i> |                           |
|          | Mt <i>FTb1</i>           | Medtr7g006170    | Mt <i>FTLd</i> |                           |
|          | Mt <i>FTb2</i>           | Medtr7g006200-10 | Mt <i>FTLe</i> |                           |
|          | Mt <i>FTc</i>            | Medtr7g099890    | Mt <i>FTLc</i> |                           |
|          | Mt <i>TFL1</i>           | Medtr7g127250    |                |                           |
|          | Mt <i>BFT</i>            |                  |                | AC146807_6.1              |
|          | Mt <i>MFT</i>            | Medtr4g155400    |                |                           |
| Soybean  | Gm <i>FTa1</i>           | Glyma16g04840    |                |                           |
|          | Gm <i>FTa2</i>           | Glyma19g28390    |                |                           |
|          | Gm <i>FTa3</i>           | Glyma16g26660    |                |                           |
|          | Gm <i>FTa4</i>           | Glyma16g26690    |                |                           |
|          | Gm <i>FTb1</i>           | Glyma08g47820    |                |                           |
|          | Gm <i>FTb2</i>           | Glyma08g47810    |                |                           |
|          | Gm <i>FTb3</i>           | Glyma18g53680    |                |                           |
|          | Gm <i>FTb4</i>           | Glyma18g53690    |                |                           |
|          | Gm <i>FTc1</i>           | Glyma16g04830    |                |                           |
|          | Gm <i>FTc2</i>           | Glyma19g28400    |                |                           |
|          | Gm <i>TFL1a</i>          | Glyma03g35250    |                |                           |
|          | Gm <i>TFL1b/Dt1</i>      | Glyma19g37890    |                |                           |
|          | Gm <i>TFL1c</i>          | Glyma13g22030    |                |                           |
|          | Gm <i>TFL1d</i>          | Glyma10g08340    |                |                           |
|          | Gm <i>BFTa</i>           | Glyma09g26550    |                |                           |
|          | Gm <i>BFTb</i>           | Glyma16g32080    |                |                           |
|          | Gm <i>MFTa</i>           | Glyma08g05650    |                |                           |
|          | Gm <i>MFTb</i>           | Glyma05g34030    |                |                           |



**Supplemental Table 2** Microsynteny in the *FTa/FTc* region in soybean (Gm) and Medicago (Mt). Fifteen genes present in the Medicago chromosome 7 region are listed along with their gene model numbers (Medtr7g) and those of their counterparts on soybean chromosome 19 (Glyma19g) and in two different regions of chromosome 16 (Glyma16g). Genes were identified as top hits in reciprocal tBLASTn searches using predicted peptide sequences on Mtr 3.0 at JCVI (Medicago, <http://www.jcvi.org/cgi-bin/medicago/index.cgi>) and Glyma1.0 at Phytozome (soybean, <http://www.phytozome.net/soybean.php>). The “Mt other” column lists the second top hits in Gm on Mt and Mt on Mt searches and suggests that no clear second region of microsynteny exists in Medicago. Ordinal numbering refers to the diagram in Supplemental Figure 1.

| no. | identity                        | Gm 16<br>Glyma16g | Mt 7<br>Medtr7g | Gm 16<br>Glyma16g | Gm 19<br>Glyma19g | Mt other |
|-----|---------------------------------|-------------------|-----------------|-------------------|-------------------|----------|
| 1   | AMP-dependent synthetase/ligase |                   | 099650          | 04910             | 28300             |          |
| 2   | peptidase                       | 26600             | 099660          | 04890             | 28310             | 8g109470 |
| 3   | importin-related                |                   | 099680-720      | 04880             | 28320-50          |          |
| 4   | hypothetical protein            | 26570-90          | 099740          |                   |                   |          |
| 5   | transferase                     | 26650             | 099760-800      | 04860-70          | 28360-70          | 3g150860 |
| 6   | FTa                             | 26660             | 099820          | 04840             | 28390             |          |
| 7   |                                 | 26690             | 099850-70       |                   |                   |          |
| 8   | FTc                             |                   | 099890          | 04830             | 28400             |          |
| 9   | transmembrane                   |                   | 099900          | 04810             | 28420             |          |
| 10  | aquaporin                       | 26720             | 099920          | 04800             | 28430             | 4g064600 |
| 11  | nucleoside phosphatase          | 26730             | 099940          | 04790             | 28440-60          | 4g042800 |
| 12  | pentatricopeptide repeat        |                   | 099950          | 04780             | 28470             | 2g127200 |
| 13  | nucleoside phosphatase          |                   | 099970-100050   | 04770-50          |                   |          |
| 14  | no apical meristem              | 26740             | 100100          | 04740             | 28500             | 2g110730 |
| 15  | glycoamidase                    |                   | 100110          |                   | 28480             |          |

**Supplemental Table 3 – primers**

| Gene          | Accession | Purpose          |                      | Primers                                              | T <sub>m</sub> (°C) |
|---------------|-----------|------------------|----------------------|------------------------------------------------------|---------------------|
| <i>PsFTa1</i> |           | Expression       | FTLa-6F<br>FTLa-2R   | GCCCAAGCAACCCTACTTTT<br>CCATCCTGGAGCGTAAACCC         | 60                  |
|               |           | Full length cDNA | FTLa-9F<br>FTLa-5R   | CCACATATGGCAGGTAGTAGC<br>CATAAAACGACACACACATGGA      | 60                  |
| <i>PsFTa2</i> |           | Expression       | FTLb-3F<br>FTLb-5R   | GGAAATGACCCCGTGATCTA<br>TGAATCCCTAAGTTGGGTCCG        | 60                  |
|               |           | Full length cDNA | FTLb-5F<br>FTLb-4R   | ATGGCCTGTAGTAGCCGGAATCC<br>AGCACCATTGATGCAGTACC      | 60                  |
| <i>PsFTb1</i> |           | Expression       | FTLe1-F4<br>FTLe1-R5 | CCTTGTAATCCTCATATGAGAG<br>CGTTGTTCCCTGTAGTTGCTGG     | 62                  |
|               |           | Full length cDNA | FTLe-2FF<br>FTLe-2R  | ATGCGTATGAAATCATCGAATCC<br>ATTATATGATCATCCTCCTTCCACC | 62                  |
| <i>PsFTb2</i> |           | Expression       | FTLe2-F7<br>FTLe2-R7 | CGACTACCGGGACAGCATTT<br>CAGGTGAACCAAGGTTATAAAC       | 62                  |
|               |           | Full length cDNA | FTLe-2FF<br>FTLe-2R  | ATGCGTATGAAATCATCGAATCC<br>ATTATATGATCATCCTCCTTCCACC | 62                  |
| <i>PsFTc</i>  |           | Expression       | FTLc-8F<br>FTLc-7R   | GATATTCCAGCCACAACAAGC<br>TTATGACGCCACTCTGGAGCAA      | 62                  |
|               |           | Full length cDNA | FTLc-9F<br>FTLc-3R   | ATGCCTAGGAATATGGTCGATCC<br>GAACTAACCCCGCCCACTTGG     | 60                  |
| <i>ACT</i>    |           | Expression       | ACT-F<br>ACT-R       | GTGTCTGGATTGGAGGATCAATC<br>GGCCACGCTCATCATATTCA      | 59                  |
| <i>PIM</i>    | AJ291298  | Expression       | PIM-4F<br>PIM-6R     | GCTTCAGAGTTTGGAACAGC<br>GACTCCATGGTGGTTTGG           | 58                  |
| <i>SEPI</i>   | AY884290  | Expression       | PM6-7F<br>PM6-8R     | GATTGCCCTGTACTGATTTTCG<br>TTGTTGAGCTTGACTTGTGG       | 60                  |
| <i>UNI</i>    | AF010190  | Expression       | UNI-1F<br>UNI-2R     | CATCAGAGCTGAAAGAAGG<br>GCTTCCTTTTCACGTTGC            | 55                  |
| <i>LF</i>     | AY343326  | Expression       | LF-CR2<br>LF-CR3     | AAATAAGCAGCAGCAACAGGG<br>CAGACATTCCAGGGACAACAG       | 60                  |
| <i>DET</i>    | AY340579  | Expression       | TFL1a-1F<br>TFL1a-2R | CGTTGGTAGAGTCATAGG<br>AGGATCACTAGGGCCAGG             | 58                  |
| <i>FD</i>     |           | Expression       | FD-6F<br>FD-3R       | ATTTGATCCAAACGTCGGTGT<br>ATCAACTTTTTGCTCCAGTTCG      | 60                  |
